# Supplementary material for: The efficacy of tranexamic acid in reducing intraoperative bleeding during transurethral resection of the prostate for benign prostatic hyperplasia (BPH): a systematic review and meta-analysis of randomized controlled trials
Source: PeerJ. 2026 Feb 11;14:e20780. doi: 10.7717/peerj.20780 (PMC12906259; doi:10.7717/peerj.20780)
Supplement: Supplemental Information 1 [file peerj-14-20780-s001.xlsx]

## Sheet: characteristics
			age（years）			Prostate size , g，ml			Preoperative IPSS			Postoperative IPSS			Total psa(ng/ml)			Free psa(ng/ml)
Ahmed Tawfick，2022	TXA	25	69.36	7.88		70.28	9.17
	placebo	25	68.88	7.82		68.88	9.27
Mohamed Samir,2022	TXA	95	64.66	5.87		108.32	16.64
	placebo	91	65.75	5.48		107.09	16.21
Behrooz Karkhanei，2019	TXA	35	66.43	7.86		36.62	16.29
	placebo	35	69.63	9.67		39.14	19.9
Jendoubi a，2017	TXA	30	67.31	7.72		47.76	16.41
	placebo	30	71.13	9.06		59.07	30.62
Abhimanyu Gupta，2021	TXA	35	68.2	8.49		56.87	14.91
	placebo	35	66.51	9.38		51.2	17.03
Wies Vanderbruggen MD，2023	TXA	31	65.6			52.3
	placebo	34	66.6			55.7
QIAN‑QIAN MENG 2019	TXA	30	71.4	5.4		73.3	8.3
	placebo	30	70.7	8.5		66.6	3.9
Tamer Diab，2024	TXA	30	67.3	9.71		64.5	10.44
	placebo	30	68.7	10.4		68.1	11.47
	TXA
	placebo
	TXA
	placebo
	TXA
	placebo
	TXA
	placebo

## Sheet: outcomes
	Operation time （min）			Length of stay （day h）			Resected tissue weight (g)			Preoperative hemoglobin (mg/dL)(g/dL)(g/L)			Postoperative 4-hour hemoglobin(g/L)			Postoperative 24-hour hemoglobin (g/L)（mg/dl）			Hemoglobin difference (mg/dL)			Hemoglobin concentration in irrigation fluid g/dl			Preoperative hematocrit			Postoperative 4-hour hematocrit			Postoperative 24-hour hematocrit			Irrigation fluid volume(L) ml			Irrigation time h			Intraoperative blood loss(ml)
研究	TXA Mean	TXA SD	TXA n	TXA Mean	TXA SD	TXA n	TXA Mean	TXA SD	TXA n	TXA Mean	TXA SD	TXA n	TXA Mean	TXA SD	TXA n	TXA Mean	TXA SD	TXA n	TXA Mean	TXA SD	TXA n	TXA Mean	TXA SD	TXA n	TXA Mean	TXA SD	TXA n	TXA Mean	TXA SD	TXA n	TXA Mean	TXA SD	TXA n	TXA Mean	TXA SD	TXA n	TXA Mean	TXA SD	TXA n	TXA Mean	TXA SD	TXA n
Ahmed Tawfick 2022	91.4	6.85	25	48.96	4.8	25				14.11	0.82	25	13.24	0.77	25	13.01	0.78	25				0.41	0.09	25										4240.16	270.35	25				395.44	109.73	25
	Cotr Mean	Cotr SD	Cotr n	Cotr Mean	Cotr SD	Cotr n	Cotr Mean	Cotr SD	Cotr n	Cotr Mean	Cotr SD	Cotr n	Cotr Mean	Cotr SD	Cotr n	Cotr Mean	Cotr SD	Cotr n	Cotr Mean	Cotr SD	Cotr n	Cotr Mean	Cotr SD	Cotr n	Cotr Mean	Cotr SD	Cotr n	Cotr Mean	Cotr SD	Cotr n	Cotr Mean	Cotr SD	Cotr n	Cotr Mean	Cotr SD	Cotr n	Cotr Mean	Cotr SD	Cotr n	Cotr Mean	Cotr SD	Cotr n
	99.2	8.74	25	50.88	7.92					13.7	0.77	25	12.6	0.82	25	12.33	0.85	25				0.48	0.06	25										4510.2	200.93	25				500.28	96.69	25
Mohamed Samir 2022	TXA Mean	TXA SD	TXA n	TXA Mean	TXA SD	TXA n	TXA Mean	TXA SD	TXA n	TXA Mean	TXA SD	TXA n	TXA Mean	TXA SD	TXA n	TXA Mean	TXA SD	TXA n	TXA Mean	TXA SD	TXA n	TXA Mean	TXA SD	TXA n	TXA Mean	TXA SD	TXA n	TXA Mean	TXA SD	TXA n	TXA Mean	TXA SD	TXA n	TXA Mean	TXA SD	TXA n	TXA Mean	TXA SD	TXA n	TXA Mean	TXA SD	TXA n
	79.93	22.18	95	55.92	7.57	95	55.15	12.28	95	13.12	1.13	95	10.67	1.17	95	10.29	1.42	95																19210	3130	95	14.75	5.15	95
	Cotr Mean	Cotr SD	Cotr n	Cotr Mean	Cotr SD	Cotr n	Cotr Mean	Cotr SD	Cotr n	Cotr Mean	Cotr SD	Cotr n	Cotr Mean	Cotr SD	Cotr n	Cotr Mean	Cotr SD	Cotr n	Cotr Mean	Cotr SD	Cotr n	Cotr Mean	Cotr SD	Cotr n	Cotr Mean	Cotr SD	Cotr n	Cotr Mean	Cotr SD	Cotr n	Cotr Mean	Cotr SD	Cotr n	Cotr Mean	Cotr SD	Cotr n	Cotr Mean	Cotr SD	Cotr n	Cotr Mean	Cotr SD	Cotr n
	90.91	21.4	91	56.85	7.08	91	51.47	11.74	91	12.59	2.37	91	9.09	1.42	91	8.91	0.9	91																23050	3800	91	18.33	2.96	91
Behrooz Karkhanei 2019	TXA Mean	TXA SD	TXA n	TXA Mean	TXA SD	TXA n	TXA Mean	TXA SD	TXA n	TXA Mean	TXA SD	TXA n	TXA Mean	TXA SD	TXA n	TXA Mean	TXA SD	TXA n	TXA Mean	TXA SD	TXA n	TXA Mean	TXA SD	TXA n	TXA Mean	TXA SD	TXA n	TXA Mean	TXA SD	TXA n	TXA Mean	TXA SD	TXA n	TXA Mean	TXA SD	TXA n	TXA Mean	TXA SD	TXA n	TXA Mean	TXA SD	TXA n
	53.57	16.43	35
	Cotr Mean	Cotr SD	Cotr n	Cotr Mean	Cotr SD	Cotr n	Cotr Mean	Cotr SD	Cotr n	Cotr Mean	Cotr SD	Cotr n	Cotr Mean	Cotr SD	Cotr n	Cotr Mean	Cotr SD	Cotr n	Cotr Mean	Cotr SD	Cotr n	Cotr Mean	Cotr SD	Cotr n	Cotr Mean	Cotr SD	Cotr n	Cotr Mean	Cotr SD	Cotr n	Cotr Mean	Cotr SD	Cotr n	Cotr Mean	Cotr SD	Cotr n	Cotr Mean	Cotr SD	Cotr n	Cotr Mean	Cotr SD	Cotr n
	120.71	47.76	35
Jendoubi 2017	TXA Mean	TXA SD	TXA n	TXA Mean	TXA SD	TXA n	TXA Mean	TXA SD	TXA n	TXA Mean	TXA SD	TXA n	TXA Mean	TXA SD	TXA n	TXA Mean	TXA SD	TXA n	TXA Mean	TXA SD	TXA n	TXA Mean	TXA SD	TXA n	TXA Mean	TXA SD	TXA n	TXA Mean	TXA SD	TXA n	TXA Mean	TXA SD	TXA n	TXA Mean	TXA SD	TXA n	TXA Mean	TXA SD	TXA n	TXA Mean	TXA SD	TXA n
	38.5	20.37	30													12.28	1.58	30	1.37	0.69	30
	Cotr Mean	Cotr SD	Cotr n	Cotr Mean	Cotr SD	Cotr n	Cotr Mean	Cotr SD	Cotr n	Cotr Mean	Cotr SD	Cotr n	Cotr Mean	Cotr SD	Cotr n	Cotr Mean	Cotr SD	Cotr n	Cotr Mean	Cotr SD	Cotr n	Cotr Mean	Cotr SD	Cotr n	Cotr Mean	Cotr SD	Cotr n	Cotr Mean	Cotr SD	Cotr n	Cotr Mean	Cotr SD	Cotr n	Cotr Mean	Cotr SD	Cotr n	Cotr Mean	Cotr SD	Cotr n	Cotr Mean	Cotr SD	Cotr n
	38.62	20.37	30													11.35	1.84	30	1.72	1.23	30
Abhimanyu Gupta 2021	TXA Mean	TXA SD	TXA n	TXA Mean	TXA SD	TXA n	TXA Mean	TXA SD	TXA n	TXA Mean	TXA SD	TXA n	TXA Mean	TXA SD	TXA n	TXA Mean	TXA SD	TXA n	TXA Mean	TXA SD	TXA n	TXA Mean	TXA SD	TXA n	TXA Mean	TXA SD	TXA n	TXA Mean	TXA SD	TXA n	TXA Mean	TXA SD	TXA n	TXA Mean	TXA SD	TXA n	TXA Mean	TXA SD	TXA n	TXA Mean	TXA SD	TXA n
	56.714	16.085	30	74.664	9.696	30													1.31	0.95	30													14929	6922	30				174.6	125.38	30
	Cotr Mean	Cotr SD	Cotr n	Cotr Mean	Cotr SD	Cotr n	Cotr Mean	Cotr SD	Cotr n	Cotr Mean	Cotr SD	Cotr n	Cotr Mean	Cotr SD	Cotr n	Cotr Mean	Cotr SD	Cotr n	Cotr Mean	Cotr SD	Cotr n	Cotr Mean	Cotr SD	Cotr n	Cotr Mean	Cotr SD	Cotr n	Cotr Mean	Cotr SD	Cotr n	Cotr Mean	Cotr SD	Cotr n	Cotr Mean	Cotr SD	Cotr n	Cotr Mean	Cotr SD	Cotr n	Cotr Mean	Cotr SD	Cotr n
	54.429	15.754	30	74.064	6.816	30													1.4	1.12	30													15486	5103	30				232.47	116.8	30
Wies Vanderbruggen MD 2023	TXA Mean	TXA SD	TXA n	TXA Mean	TXA SD	TXA n	TXA Mean	TXA SD	TXA n	TXA Mean	TXA SD	TXA n	TXA Mean	TXA SD	TXA n	TXA Mean	TXA SD	TXA n	TXA Mean	TXA SD	TXA n	TXA Mean	TXA SD	TXA n	TXA Mean	TXA SD	TXA n	TXA Mean	TXA SD	TXA n	TXA Mean	TXA SD	TXA n	TXA Mean	TXA SD	TXA n	TXA Mean	TXA SD	TXA n	TXA Mean	TXA SD	TXA n
	44.6	16.1	31	46.9	16.1	31										12.9	1.5	31	1	0.9	31													10700	10100	31	24.3	11.8	31
	Cotr Mean	Cotr SD	Cotr n	Cotr Mean	Cotr SD	Cotr n	Cotr Mean	Cotr SD	Cotr n	Cotr Mean	Cotr SD	Cotr n	Cotr Mean	Cotr SD	Cotr n	Cotr Mean	Cotr SD	Cotr n	Cotr Mean	Cotr SD	Cotr n	Cotr Mean	Cotr SD	Cotr n	Cotr Mean	Cotr SD	Cotr n	Cotr Mean	Cotr SD	Cotr n	Cotr Mean	Cotr SD	Cotr n	Cotr Mean	Cotr SD	Cotr n	Cotr Mean	Cotr SD	Cotr n	Cotr Mean	Cotr SD	Cotr n
	49.6	27.6	34	59.2	20.8	34										13.01	1.3	34	1.6	1.1	34													18500	10300	34	37.9	21.7	34
QIAN‑QIAN MENG 2019	TXA Mean	TXA SD	TXA n	TXA Mean	TXA SD	TXA n	TXA Mean	TXA SD	TXA n	TXA Mean	TXA SD	TXA n	TXA Mean	TXA SD	TXA n	TXA Mean	TXA SD	TXA n	TXA Mean	TXA SD	TXA n	TXA Mean	TXA SD	TXA n	TXA Mean	TXA SD	TXA n	TXA Mean	TXA SD	TXA n	TXA Mean	TXA SD	TXA n	TXA Mean	TXA SD	TXA n	TXA Mean	TXA SD	TXA n	TXA Mean	TXA SD	TXA n
	101.7	8.9	30	15.9	5.2	30																																		102	11.4	30
	Cotr Mean	Cotr SD	Cotr n	Cotr Mean	Cotr SD	Cotr n	Cotr Mean	Cotr SD	Cotr n	Cotr Mean	Cotr SD	Cotr n	Cotr Mean	Cotr SD	Cotr n	Cotr Mean	Cotr SD	Cotr n	Cotr Mean	Cotr SD	Cotr n	Cotr Mean	Cotr SD	Cotr n	Cotr Mean	Cotr SD	Cotr n	Cotr Mean	Cotr SD	Cotr n	Cotr Mean	Cotr SD	Cotr n	Cotr Mean	Cotr SD	Cotr n	Cotr Mean	Cotr SD	Cotr n	Cotr Mean	Cotr SD	Cotr n
	89.7	5.2	30	13.9	3.9	30																																		303.6	24.8	30
Tamer Diab 2024	TXA Mean	TXA SD	TXA n	TXA Mean	TXA SD	TXA n	TXA Mean	TXA SD	TXA n	TXA Mean	TXA SD	TXA n	TXA Mean	TXA SD	TXA n	TXA Mean	TXA SD	TXA n	TXA Mean	TXA SD	TXA n	TXA Mean	TXA SD	TXA n	TXA Mean	TXA SD	TXA n	TXA Mean	TXA SD	TXA n	TXA Mean	TXA SD	TXA n	TXA Mean	TXA SD	TXA n	TXA Mean	TXA SD	TXA n	TXA Mean	TXA SD	TXA n
	98.8	15.69	30	56.88	11.76	30										12.5	0.68	30																						137.73	34.28	30
	Cotr Mean	Cotr SD	Cotr n	Cotr Mean	Cotr SD	Cotr n	Cotr Mean	Cotr SD	Cotr n	Cotr Mean	Cotr SD	Cotr n	Cotr Mean	Cotr SD	Cotr n	Cotr Mean	Cotr SD	Cotr n	Cotr Mean	Cotr SD	Cotr n	Cotr Mean	Cotr SD	Cotr n	Cotr Mean	Cotr SD	Cotr n	Cotr Mean	Cotr SD	Cotr n	Cotr Mean	Cotr SD	Cotr n	Cotr Mean	Cotr SD	Cotr n	Cotr Mean	Cotr SD	Cotr n	Cotr Mean	Cotr SD	Cotr n
	108.4	14.8	30	62.4	12	30										10.96	0.6	30																						158.9	14.63	30

## Sheet: Complications
			Blood transfusion	Infection	TURP syndrome	Bleeding and clot retention	secondary hemorrhage
Ahmed Tawfick，2022	TXA	25	0	0	0
	placebo	25	0	0	1
Mohamed Samir,2022	TXA	95	4
	placebo	91	5
Tamer Diab，2024	TXA	30		1		2	0
	placebo	30		0		9	1
